# Supplementary material
Source: MDPI journal article supplement (https://www.mdpi.com/2071-1050/16/1/222)
Supplement: s1 [file s1]

# Human health risk assessment of heavy metals and nitrates associated with oral and dermal groundwater exposure: the Poirino Plateau case study (NW Italy)

Daniele Cocca<sup>1</sup>, Manuela Lasagna<sup>1</sup>, Enrico Destefanis<sup>1</sup>, Chiara Bottasso<sup>1</sup>, Domenico Antonio De Luca<sup>1\*</sup>

<sup>1</sup> Earth Sciences Department, University of Turin, Turin (Italy)

Table S1. Statistical analysis of chemical-physical parameters.

|                         | Mean   | Standard deviation |
|-------------------------|--------|--------------------|
| pH                      | 7.94   | 0.21               |
| EC (μS/cm)              | 611    | 242                |
| HCO <sub>3</sub> (mg/L) | 198.99 | 55.80              |
| SO <sub>4</sub> (mg/L)  | 48.99  | 85.18              |
| NO <sub>3</sub> (mg/L)  | 27.54  | 24.29              |
| Cl (mg/L)               | 31.22  | 30.96              |
| F (mg/L)                | 1.88   | 1.69               |
| Ca (mg/L)               | 101.57 | 45.08              |
| Mg (mg/L)               | 22.06  | 10.48              |
| K (mg/L)                | 5.61   | 12.34              |
| NH <sub>4</sub> (mg/L)  | 0.50   | 0.45               |
| Na (mg/L)               | 17.37  | 10.50              |
| Al (μg/L)               | 24.45  | 19.73              |
| CrVI (μg/L)             | 10.320 | 11.148             |
| Mn (μg/L)               | 2.80   | 2.34               |
| Co (μg/L)               | 1.708  | 0.119              |
| Ni (μg/L)               | 1.29   | 1.30               |
| Cu (μg/L)               | 0.40   | 1.34               |
| Zn (μg/L)               | 75     | 357                |
| Cd (μg/L)               | <0.058 | /                  |
| Ba (μg/L)               | 21.27  | 13.84              |
| Pb (μg/L)               | <0.23  | /                  |
| HPI                     | 58.02  | 72.74              |

Table S2. Non-carcinogenic risk (HQ) for the individual samples and parameters.

| ID sample | Parameters      | HQ oral  |          |          | HQ dermal |           |         |
|-----------|-----------------|----------|----------|----------|-----------|-----------|---------|
|           |                 | Children | Adults   | Workers  | Children  | Adults    | Workers |
| 1         | NO <sub>3</sub> | 0.782    | 0.335    | 0.12     | 0.01033   | 0.0035    | 0.00178 |
|           | Cr VI           | 0.0725   | 0.0311   | 0.0111   | 0.01913   | 0.00648   | 0.00329 |
|           | NH <sub>4</sub> | 0.00316  | 1.36E-03 | 4.84E-04 | 4.2E-05   | 1.415E-05 | 7.2E-06 |
|           | Ni              | 0        | 0        | 0        | 0         | 0         | 0       |
|           | Al              | 0.00245  | 1.05E-03 | 3.76E-04 | 1.6E-05   | 5.492E-06 | 2.8E-06 |
|           | Zn              | 0.00192  | 8.22E-04 | 2.94E-04 | 1.3E-05   | 4.29E-06  | 2.2E-06 |
|           | Co              | 0        | 0        | 0        | 0         | 0         | 0       |

|   |                 |         |          |          |         |               |         |
|---|-----------------|---------|----------|----------|---------|---------------|---------|
|   | Ba              | 0.0137  | 5.89E-03 | 2.10E-03 | 0.0013  | 0.000439<br>3 | 0.00022 |
|   | F               | 4.52    | 1.94E+00 | 6.92E-01 | 0.02985 | 0.01012       | 0.00513 |
|   | Mn              | 0       | 0        | 0        | 0       | 0             | 0       |
|   | Cu              | 0       | 0        | 0        | 0       | 0             | 0       |
|   | HI tot          | 5.3949  | 2.315    | 0.82663  | 0.06077 | 0.020921<br>6 | 0.00996 |
| 2 | NO <sub>3</sub> | 1.18    | 0.508    | 0.181    | 0.01564 | 0.0053        | 0.00269 |
|   | Cr VI           | 0.11    | 0.0475   | 0.017    | 0.02925 | 0.009916      | 0.00503 |
|   | NH <sub>4</sub> | 0.00231 | 9.89E-04 | 3.53E-04 | 3E-05   | 1.032E-05     | 5.2E-06 |
|   | Ni              | 0       | 0        | 0        | 0       | 0             | 0       |
|   | Al              | 0       | 0        | 0        | 0       | 0             | 0       |
|   | Zn              | 0       | 0        | 0        | 0       | 0             | 0       |
|   | Co              | 0.362   | 1.55E-01 | 5.54E-02 | 0.00239 | 0.000810<br>4 | 0.00041 |
|   | Ba              | 0.00863 | 3.70E-03 | 1.32E-03 | 0.00081 | 0.000278<br>5 | 0.00014 |
|   | F               | 0       | 0        | 0        | 0       | 0             | 0       |
|   | Mn              | 0       | 0        | 0        | 0       | 0             | 0       |
|   | Cu              | 0       | 0        | 0        | 0       | 0             | 0       |
|   | HI tot          | 1.6616  | 0.71509  | 0.25518  | 0.04787 | 0.015958<br>7 | 0.00498 |
| 3 | NO <sub>3</sub> | 1.98    | 0.85     | 0.304    | 0.02618 | 0.008875      | 0.0045  |
|   | Cr VI           | 0       | 0        | 0        | 0       | 0             | 0       |
|   | NH <sub>4</sub> | 0       | 0        | 0        | 0       | 0             | 0       |
|   | Ni              | 0       | 1.10E-03 | 3.91E-04 | 0.00042 | 0.000143      | 7.3E-05 |
|   | Al              | 0       | 0        | 0        | 0       | 0             | 0       |
|   | Zn              | 0.00277 | 1.19E-03 | 4.24E-04 | 1.8E-05 | 6.197E-06     | 3.1E-06 |
|   | Co              | 0       | 0        | 0        | 0       | 0             | 0       |
|   | Ba              | 0.0112  | 4.79E-03 | 1.71E-03 | 0.00106 | 0.000357<br>5 | 0.00018 |
|   | F               | 0       | 0        | 0        | 0       | 0             | 0       |
|   | Mn              | 0       | 0        | 0        | 0       | 0             | 0       |
|   | Cu              | 0       | 0        | 0        | 0       | 0             | 0       |
|   | HI tot          | 2.001   | 0.8574   | 0.3067   | 0.02808 | 0.009688<br>8 | 0.00484 |
| 4 | NO <sub>3</sub> | 3.16    | 1.35     | 0.483    | 0.04166 | 0.01412       | 0.00072 |
|   | Cr VI           | 0.0469  | 0.0201   | 0.00718  | 0.01238 | 0.004195      | 0.00213 |
|   | NH <sub>4</sub> | 0       | 0        | 0        | 0       | 0             | 0       |
|   | Ni              | 0.0131  | 5.62E-03 | 2.01E-03 | 0.00216 | 0.000732<br>9 | 0.00037 |
|   | Al              | 0       | 0        | 0        | 0       | 0             | 0       |
|   | Zn              | 0.149   | 6.40E-02 | 2.29E-02 | 0.00099 | 0.000334<br>2 | 0.00017 |
|   | Co              | 0.426   | 1.83E-01 | 6.52E-02 | 0.00281 | 0.000953<br>4 | 0.00048 |
|   | Ba              | 0.0115  | 4.93E-03 | 1.76E-03 | 0.00109 | 0.000367<br>7 | 0.00019 |
|   | F               | 3.94    | 1.69E+00 | 6.03E-01 | 0.02602 | 0.008819      | 0.00447 |

|   |                 |              |          |          |         |               |         |
|---|-----------------|--------------|----------|----------|---------|---------------|---------|
|   | Mn              | 0.00073<br>1 | 3.13E-04 | 1.12E-04 | 6.9E-05 | 2.335E-05     | 1.2E-05 |
|   | Cu              | 0            | 0        | 0        | 0       | 0             | 0       |
|   | HI tot          | 7.7467       | 3.32     | 1.1857   | 0.08738 | 0.029791<br>2 | 0.01489 |
| 5 | NO <sub>3</sub> | 0.044        | 0.0189   | 0.00674  | 0.00058 | 0.000197      | 1E-04   |
|   | Cr VI           | 0            | 0        | 0        | 0       | 0             | 0       |
|   | NH <sub>4</sub> | 0.0265       | 1.14E-02 | 4.06E-03 | 0.00035 | 0.000118<br>5 | 6E-05   |
|   | Ni              | 0.00416      | 1.78E-03 | 6.36E-04 | 0.00069 | 0.000232<br>4 | 0.00012 |
|   | Al              | 0.00067<br>1 | 2.88E-04 | 1.03E-04 | 4.4E-06 | 1.502E-06     | 7.6E-07 |
|   | Zn              | 0            | 0        | 0        | 0       | 0             | 0       |
|   | Co              | 0            | 0        | 0        | 0       | 0             | 0       |
|   | Ba              | 0.00671      | 2.88E-03 | 1.03E-03 | 0.00063 | 0.000214<br>5 | 0.00011 |
|   | F               | 0            | 0        | 0        | 0       | 0             | 0       |
|   | Mn              | 0.00251      | 1.08E-03 | 3.84E-04 | 0.00024 | 8.026E-05     | 4.1E-05 |
|   | Cu              | 0            | 0        | 0        | 0       | 0             | 0       |
|   | HI tot          | 0.085        | 0.0363   | 0.013    | 0.00252 | 0.011700<br>7 | 0.00045 |
| 6 | NO <sub>3</sub> | 1.36         | 0.582    | 0.208    | 0.01793 | 0.006078      | 0.00308 |
|   | Cr VI           | 0.0447       | 0.0192   | 0.00685  | 0.01181 | 0.004004      | 0.00203 |
|   | NH <sub>4</sub> | 0            | 0        | 0        | 0       | 0             | 0       |
|   | Ni              | 0.00416      | 1.78E-03 | 6.36E-04 | 0.00069 | 0.000232<br>4 | 0.00012 |
|   | Al              | 0            | 0        | 0        | 0       | 0             | 0       |
|   | Zn              | 0            | 0        | 0        | 0       | 0             | 0       |
|   | Co              | 0.362        | 1.55E-01 | 5.54E-02 | 0.00239 | 0.000810<br>4 | 0.00041 |
|   | Ba              | 0.0141       | 6.03E-03 | 2.15E-03 | 0.00133 | 0.000449<br>5 | 0.00023 |
|   | F               | 0.309        | 1.32E-01 | 4.73E-02 | 0.00204 | 0.000691<br>2 | 0.00035 |
|   | Mn              | 0            | 0        | 0        | 0       | 0             | 0       |
|   | Cu              | 0            | 0        | 0        | 0       | 0             | 0       |
|   | HI tot          | 2.0969       | 0.8965   | 0.3204   | 0.03572 | 0.011903<br>6 | 0.00595 |
| 7 | NO <sub>3</sub> | 0.501        | 0.215    | 0.0767   | 0.00661 | 0.002241      | 0.00112 |
|   | Cr VI           | 0.65         | 0.279    | 0.0995   | 0.1716  | 0.05816       | 0.02908 |
|   | NH <sub>4</sub> | 0.0111       | 0.00477  | 0.0017   | 0.00015 | 4.983E-05     | 2.5E-05 |
|   | Ni              | 0            | 0        | 0        | 0       | 0             | 0       |
|   | Al              | 0            | 0        | 0        | 0       | 0             | 0       |
|   | Zn              | 0            | 0        | 0        | 0       | 0             | 0       |
|   | Co              | 0.341        | 0.146    | 0.0522   | 0.00225 | 0.000762<br>7 | 0.00038 |
|   | Ba              | 0.00479      | 0.00205  | 0.00073  | 0.00045 | 0.000153<br>2 | 7.7E-05 |

|    |                 |              |          |          |         |               |         |
|----|-----------------|--------------|----------|----------|---------|---------------|---------|
|    | F               | 2.19         | 0.941    | 0.336    | 0.01449 | 0.00491       | 0.00246 |
|    | Mn              | 0            | 0        | 0        | 0       | 0             | 0       |
|    | Cu              | 0            | 0        | 0        | 0       | 0             | 0       |
|    | HI tot          | 3.6999       | 1.59139  | 0.56692  | 0.19687 | 0.066955<br>1 | 0.03348 |
| 8  | NO <sub>3</sub> | 2.82         | 1.21     | 0.431    | 0.03716 | 0.0126        | 0.0063  |
|    | Cr VI           | 0.098        | 0.042    | 0.015    | 0.02588 | 0.008772      | 0.00439 |
|    | NH <sub>4</sub> | 0.00606      | 2.60E-03 | 9.28E-04 | 0.00008 | 2.713E-05     | 1.4E-05 |
|    | Ni              | 0.00192      | 8.22E-04 | 2.94E-04 | 0.00032 | 0.000107<br>3 | 5.4E-05 |
|    | Al              | 0            | 0        | 0        | 0       | 0             | 0       |
|    | Zn              | 0            | 0        | 0        | 0       | 0             | 0       |
|    | Co              | 0.362        | 1.55E-01 | 5.54E-02 | 0.00239 | 0.000810<br>4 | 0.00041 |
|    | Ba              | 0.00479      | 2.05E-03 | 7.34E-04 | 0.00045 | 0.000153<br>2 | 7.7E-05 |
|    | F               | 0            | 0        | 0        | 0       | 0             | 0       |
|    | Mn              | 0            | 0        | 0        | 0       | 0             | 0       |
|    | Cu              | 0.00417      | 1.79E-03 | 6.38E-04 | 4.8E-05 | 1.637E-05     | 8.2E-06 |
|    | HI tot          | 3.3016       | 1.4093   | 0.50359  | 0.06668 | 0.022891<br>7 | 0.01145 |
| 9  | NO <sub>3</sub> | 2.42         | 1.04     | 0.371    | 0.03198 | 0.01084       | 0.00542 |
|    | Cr VI           | 0.222        | 0.095    | 0.0339   | 0.05851 | 0.01983       | 0.00992 |
|    | NH <sub>4</sub> | 0.00619      | 2.65E-03 | 9.48E-04 | 8.2E-05 | 0.000027<br>7 | 1.4E-05 |
|    | Ni              | 0.00032      | 1.37E-04 | 4.89E-05 | 5.3E-05 | 1.788E-05     | 8.9E-06 |
|    | Al              | 0            | 0        | 0        | 0       | 0             | 0       |
|    | Zn              | 0            | 0        | 0        | 0       | 0             | 0       |
|    | Co              | 0.405        | 1.74E-01 | 6.20E-02 | 0.00267 | 0.000905<br>8 | 0.00045 |
|    | Ba              | 0.00569      | 2.44E-03 | 8.71E-04 | 0.00054 | 0.000181<br>8 | 9.1E-05 |
|    | F               | 0            | 0        | 0        | 0       | 0             | 0       |
|    | Mn              | 0            | 0        | 0        | 0       | 0             | 0       |
|    | Cu              | 0            | 0        | 0        | 0       | 0             | 0       |
|    | HI tot          | 3.0577       | 1.3104   | 0.4689   | 0.09339 | 0.031793<br>4 | 0.0159  |
| 10 | NO <sub>3</sub> | 0.615        | 0.263    | 0.0941   | 0.00812 | 0.002751      | 0.00138 |
|    | Cr VI           | 0.303        | 0.13     | 0.0463   | 0.07988 | 0.02708       | 0.01354 |
|    | NH <sub>4</sub> | 0.00712      | 3.05E-03 | 1.09E-03 | 9.4E-05 | 3.185E-05     | 1.6E-05 |
|    | Ni              | 0.00224      | 1.55E-01 | 3.42E-04 | 0.00037 | 0.000125<br>1 | 6.3E-05 |
|    | Al              | 0            | 0        | 0        | 0       | 0             | 0       |
|    | Zn              | 0            | 0        | 0        | 0       | 0             | 0       |
|    | Co              | 0.362        | 1.55E-01 | 5.54E-02 | 0.00239 | 0.000810<br>4 | 0.00041 |
|    | Ba              | 0.00095<br>9 | 4.11E-04 | 1.47E-04 | 9E-05   | 3.065E-05     | 1.5E-05 |
|    | F               | 0            | 0        | 0        | 0       | 0             | 0       |

|    |                 |              |               |          |         |               |         |
|----|-----------------|--------------|---------------|----------|---------|---------------|---------|
|    | Mn              | 0            | 0             | 0        | 0       | 0             | 0       |
|    | Cu              | 0            | 0             | 0        | 0       | 0             | 0       |
|    | HI tot          | 1.2936       | 0.7064        | 0.19742  | 0.09076 | 0.030918<br>5 | 0.01546 |
| 11 | NO <sub>3</sub> | 0.251        | 0.108         | 0.0384   | 0.00332 | 0.001124      | 0.00056 |
|    | Cr VI           | 0.831        | 0.356         | 0.127    | 0.2194  | 0.07437       | 0.03719 |
|    | NH <sub>4</sub> | 0            | 0             | 0        | 0       | 0             | 0       |
|    | Ni              | 0            | 0             | 0        | 0       | 0             | 0       |
|    | Al              | 0            | 0             | 0        | 0       | 0             | 0       |
|    | Zn              | 0            | 0             | 0        | 0       | 0             | 0       |
|    | Co              | 0.362        | 0.155         | 0.0554   | 0.00239 | 0.000810<br>4 | 0.00041 |
|    | Ba              | 0.00054<br>3 | 0.0002.3<br>3 | 8.32E-05 | 5.1E-05 | 1.737E-05     | 8.7E-06 |
|    | F               | 2.55         | 1.09          | 0.39     | 0.01683 | 0.005706      | 0.00285 |
|    | Mn              | 0            | 0             | 0        | 0       | 0             | 0       |
|    | Cu              | 0            | 0             | 0        | 0       | 0             | 0       |
|    | HI tot          | 3.9961       | 1.7097        | 0.61134  | 0.24384 | 0.082946<br>5 | 0.04147 |
| 12 | NO <sub>3</sub> | 1.18         | 0.507         | 0.00069  | 0.0156  | 0.005288      | 0.00264 |
|    | Cr VI           | 0.303        | 0.13          | 0.0463   | 0.07988 | 0.02708       | 0.01354 |
|    | NH <sub>4</sub> | 0.00448      | 1.92E-03      | 6.86E-04 | 5.9E-05 | 2.005E-05     | 1E-05   |
|    | Ni              | 0            | 0             | 0        | 0       | 0             | 0       |
|    | Al              | 0            | 0             | 0        | 0       | 0             | 0       |
|    | Zn              | 0            | 0             | 0        | 0       | 0             | 0       |
|    | Co              | 0.341        | 1.46E-01      | 5.22E-02 | 0.00225 | 0.000762<br>7 | 0.00038 |
|    | Ba              | 0.00479      | 2.05E-03      | 7.34E-04 | 0.00045 | 0.000153<br>2 | 7.7E-05 |
|    | F               | 0            | 0             | 0        | 0       | 0             | 0       |
|    | Mn              | 0            | 0             | 0        | 0       | 0             | 0       |
|    | Cu              | 0            | 0             | 0        | 0       | 0             | 0       |
|    | HI tot          | 1.832        | 0.787         | 0.10071  | 0.09782 | 0.032937<br>3 | 0.01647 |
| 13 | NO <sub>3</sub> | 0.381        | 0.163         | 0.0583   | 0.00503 | 0.001703      | 0.00085 |
|    | Cr VI           | 0.258        | 0.111         | 0.0395   | 0.06807 | 0.02307       | 0.01154 |
|    | NH <sub>4</sub> | 0            | 0             | 0        | 0       | 0             | 0       |
|    | Ni              | 0            | 0             | 0        | 0       | 0             | 0       |
|    | Al              | 0            | 0             | 0        | 0       | 0             | 0       |
|    | Zn              | 0            | 0             | 0        | 0       | 0             | 0       |
|    | Co              | 0.341        | 1.46E-01      | 5.22E-02 | 0.00225 | 0.000762<br>7 | 0.00038 |
|    | Ba              | 0.00339      | 1.45E-03      | 5.19E-04 | 0.00032 | 0.000108<br>3 | 5.4E-05 |
|    | F               | 0            | 0             | 0        | 0       | 0             | 0       |
|    | Mn              | 0            | 0             | 0        | 0       | 0             | 0       |
|    | Cu              | 0            | 0             | 0        | 0       | 0             | 0       |
|    | HI tot          | 0.986        | 0.4217        | 0.15032  | 0.07584 | 0.025946<br>3 | 0.01297 |

|    |                 |         |          |          |         |               |         |
|----|-----------------|---------|----------|----------|---------|---------------|---------|
| 14 | NO <sub>3</sub> | 1.02    | 0.44     | 0.157    | 0.01356 | 0.004597      | 0.0023  |
|    | Cr VI           | 0       | 0        | 0        | 0       | 0             | 0       |
|    | NH <sub>4</sub> | 0.00402 | 1.72E-03 | 0.00062  | 5.3E-05 | 1.799E-05     | 9E-06   |
|    | Ni              | 0       | 0        | 0        | 0       | 0             | 0       |
|    | Al              | 0       | 0        | 0        | 0       | 0             | 0       |
|    | Zn              | 0.133   | 5.68E-02 | 2.03E-02 | 0.00087 | 0.000296<br>5 | 0.00015 |
|    | Co              | 0       | 0        | 0        | 0       | 0             | 0       |
|    | Ba              | 0.00991 | 4.25E-03 | 1.52E-03 | 0.00093 | 0.000316<br>7 | 0.00016 |
|    | F               | 0       | 0        | 0        | 0       | 0             | 0       |
|    | Mn              | 0       | 0        | 0        | 0       | 0             | 0       |
|    | Cu              | 0       | 0        | 0        | 0       | 0             | 0       |
|    | HI tot          | 1.1747  | 0.5027   | 0.1795   | 0.0155  | 0.004831<br>7 | 0.00242 |
| 15 | NO <sub>3</sub> | 0.637   | 0.273    | 0.0975   | 0.00841 | 0.00285       | 0.00143 |
|    | Cr VI           | 0.0149  | 0.00639  | 0.00228  | 0.00394 | 0.001335      | 0.00067 |
|    | NH <sub>4</sub> | 0.00382 | 1.64E-03 | 5.85E-04 | 5E-05   | 0.000017<br>1 | 8.6E-06 |
|    | Ni              | 0       | 0        | 0        | 0       | 0             | 0       |
|    | Al              | 0       | 0        | 0        | 0       | 0             | 0       |
|    | Zn              | 0       | 0        | 0        | 0       | 0             | 0       |
|    | Co              | 0       | 0        | 0        | 0       | 0             | 0       |
|    | Ba              | 0.0125  | 5.34E-03 | 1.91E-03 | 0.00118 | 0.000398<br>4 | 0.0002  |
|    | F               | 0       | 0        | 0        | 0       | 0             | 0       |
|    | Mn              | 0       | 0        | 0        | 0       | 0             | 0       |
|    | Cu              | 0       | 0        | 0        | 0       | 0             | 0       |
|    | HI tot          | 0.6685  | 0.2862   | 0.10272  | 0.01377 | 0.004982<br>9 | 0.00249 |
| 16 | NO <sub>3</sub> | 0.272   | 0.117    | 0.0416   | 0.00359 | 0.001217      | 0.00061 |
|    | Cr VI           | 0.262   | 0.112    | 0.0401   | 0.06919 | 0.02345       | 0.01173 |
|    | NH <sub>4</sub> | 0.0054  | 0.00232  | 0.00083  | 7.1E-05 | 2.418E-05     | 1.2E-05 |
|    | Ni              | 0       | 0        | 0        | 0       | 0             | 0       |
|    | Al              | 0       | 0        | 0        | 0       | 0             | 0       |
|    | Zn              | 0.00213 | 0.00091  | 0.00033  | 1.4E-05 | 0             | 0       |
|    | Co              | 0.362   | 0.155    | 0.0554   | 0.00239 | 0.000810<br>4 | 0.00041 |
|    | Ba              | 0.00435 | 0.00186  | 0.00067  | 0.00041 | 0.000138<br>9 | 6.9E-05 |
|    | F               | 0       | 0        | 0        | 0       | 0             | 0       |
|    | Mn              | 0       | 0        | 0        | 0       | 0             | 0       |
|    | Cu              | 0       | 0        | 0        | 0       | 0             | 0       |
|    | HI tot          | 1.1739  | 0.5002   | 0.17994  | 0.0787  | 0.026896<br>8 | 0.01345 |
| 17 | NO <sub>3</sub> | 0.0137  | 0.00589  | 0.0021   | 0.00018 | 0.000061<br>5 | 3.1E-05 |
|    | Cr VI           | 0.0405  | 0.0174   | 0.0062   | 0.01069 | 0.003623      | 0.00181 |
|    | NH <sub>4</sub> | 0.00554 | 0.00237  | 0.00085  | 7.3E-05 | 2.477E-05     | 1.2E-05 |

|    |                 |              |         |         |         |               |         |
|----|-----------------|--------------|---------|---------|---------|---------------|---------|
|    | Ni              | 0            | 0       | 0       | 0       | 0             | 0       |
|    | Al              | 0            | 0       | 0       | 0       | 0             | 0       |
|    | Zn              | 0            | 0       | 0       | 0       | 0             | 0       |
|    | Co              | 0.362        | 0.155   | 0.0554  | 0.00239 | 0.000810<br>4 | 0.00041 |
|    | Ba              | 0.0015       | 0.00064 | 0.00023 | 0.00014 | 4.801E-05     | 2.4E-05 |
|    | F               | 0            | 0       | 0       | 0       | 0             | 0       |
|    | Mn              | 0            | 0       | 0       | 0       | 0             | 0       |
|    | Cu              | 0            | 0       | 0       | 0       | 0             | 0       |
|    | HI tot          | 0.4218       | 0.1806  | 0.06516 | 0.01475 | 0.004914<br>6 | 0.00246 |
|    |                 |              |         |         |         |               |         |
| 18 | NO <sub>3</sub> | 0            | 0       | 0       | 0       | 0             | 0       |
|    | Cr VI           | 0.0426       | 0.0183  | 0.00652 | 0.01125 | 0.003814      | 0.00191 |
|    | NH <sub>4</sub> | 0            | 0       | 0       | 0       | 0             | 0       |
|    | Ni              | 0            | 0       | 0       | 0       | 0             | 0       |
|    | Al              | 0            | 0       | 0       | 0       | 0             | 0       |
|    | Zn              | 0.00021<br>3 | 9.1E-05 | 3.3E-05 | 1.4E-06 | 4.767E-07     | 2.4E-07 |
|    | Co              | 0.341        | 0.146   | 0.0522  | 0.00225 | 0.000762<br>7 | 0.00038 |
|    | Ba              | 0.00265      | 0.00114 | 0.00041 | 0.00025 | 8.479E-05     | 4.2E-05 |
|    | F               |              | 0       | 0       | 0       | 0             | 0       |
|    | Mn              | 0.00059<br>4 | 0.00025 | 9.1E-05 | 5.6E-06 | 1.897E-05     | 9.5E-06 |
|    | Cu              | 0.00726      | 0.00311 | 0.00111 | 8.4E-05 | 2.848E-05     | 1.4E-05 |
|    | HI tot          | 0.3952       | 0.16866 | 0.05774 | 0.0149  | 0.032966<br>9 | 0.01648 |

Table S3. Carcinogenic risk (R) for the individual samples.

| ID sample | Parameter | R oral   |          |          | R dermal |           |          |
|-----------|-----------|----------|----------|----------|----------|-----------|----------|
|           |           | Children | Adults   | Workers  | Children | Adults    | Workers  |
| 1         | Cr VI     | 1.12E-01 | 1.60E-02 | 5.94E-03 | 6.15E-08 | 1.042E-07 | 4.4E-08  |
| 2         | Cr VI     | 1.72E-01 | 2.44E-02 | 9.09E-03 | 9.4E-08  | 1.594E-07 | 6.74E-08 |
| 3         | Cr VI     | 0        | 0        | 0        | 0        | 0         | 0        |
| 4         | Cr VI     | 7.28E-02 | 1.03E-02 | 3.84E-03 | 3.98E-08 | 6.742E-08 | 2.85E-08 |
| 5         | Cr VI     | 0        | 0        | 0        | 0        | 0         | 0        |
| 6         | Cr VI     | 6.95E-02 | 9.86E-03 | 3.67E-03 | 3.8E-08  | 6.436E-08 | 2.72E-08 |
| 7         | Cr VI     | 1.01E+00 | 1.43E-01 | 5.33E-02 | 5.52E-07 | 9.347E-07 | 3.95E-07 |
| 8         | Cr VI     | 1.52E-01 | 2.16E-02 | 8.04E-03 | 8.32E-08 | 1.41E-07  | 5.96E-08 |
| 9         | Cr VI     | 3.44E-01 | 4.88E-02 | 1.82E-02 | 1.88E-07 | 3.187E-07 | 1.35E-07 |
| 10        | Cr VI     | 4.70E-01 | 6.67E-02 | 2.48E-02 | 2.57E-07 | 4.352E-07 | 1.84E-07 |
| 11        | Cr VI     | 1.29E+00 | 1.83E-01 | 6.81E-02 | 7.05E-07 | 1.195E-06 | 5.05E-07 |
| 12        | Cr VI     | 4.70E-01 | 6.67E-02 | 2.48E-02 | 2.57E-07 | 4.352E-07 | 1.84E-07 |
| 13        | Cr VI     | 4.00E-01 | 5.68E-02 | 2.11E-02 | 2.19E-07 | 3.708E-07 | 1.57E-07 |
| 14        | Cr VI     | 0        | 0        | 0        | 0        | 0         | 0        |

|    |       |          |          |          |          |           |          |
|----|-------|----------|----------|----------|----------|-----------|----------|
| 15 | Cr VI | 2.32E-02 | 3.29E-03 | 1.22E-03 | 1.27E-08 | 2.145E-08 | 9.07E-09 |
| 16 | Cr VI | 4.07E-01 | 5.78E-02 | 2.15E-02 | 2.22E-07 | 3.769E-07 | 1.59E-07 |
| 17 | Cr VI | 6.28E-02 | 8.92E-03 | 3.32E-03 | 3.44E-08 | 5.823E-08 | 2.46E-08 |
| 18 | Cr VI | 6.61E-02 | 9.39E-03 | 3.49E-03 | 3.62E-08 | 6.129E-08 | 2.59E-08 |
